# Supplementary material
Source: publisher figshare collection journal article supplement (https://future-science-group.figshare.com/articles/dataset/_/21409356)
Supplement: Supplementary file 1 [file 2]

Supplemental Table 1. The variation in physicochemical properties of detergent free HA-ENVs by changing the percentage of miltefosine.

| **Formulation code** | **SPC:Milt:PAM:amp-B (%w/w)** | **Vesicle size**  **(nm)** | **PDI** | **Elasticity** | **EE% ± SD**  **(PAM/Amp-B)** |
| --- | --- | --- | --- | --- | --- |
| HA-ENVs 1 | 10:0.05:1:0.2 | 248.2 ± 3.1 | 0.193 | 21 | 77.3 ± 3.2/91.5 ± 2.8 |
| HA- ENVs 2 | 10:0.1:1:0.2 | 183.7 ± 2.4 | 0.139 | 25 | 74.1 ± 2.4/88.3 ± 2.2 |
| HA- ENVs 3 | 10:0.2:1:0.2 | 139.1 ± 1.8 | 0.114 | 33 | 73.6 ± 3.1/84.4 ± 3.4 |
| HA- ENVs 4 | 10:0.3:1:0.2 | 114.5 ± 2.3 | 0.122 | 37 | 70.4 ± 2.2/83.2 ± 3.0 |
| HA- ENVs 5 | 10:0.4:1:0.2 | 94.2 ± 1.9 | 0.103 | 46 | 68.7 ± 2.0/82.9 ± 2.3 |
| HA- ENVs 6 | 10:0.5:1:0.2 | 26.3 ± 2.9 | 0.452 | 16 | 31.2 ± 4.8/56.4 ± 3.8 |
| Uncoated ENVs | 10:0.4:1:0.2 | 73.7 ± 2.6 | 0.081 | 51 | 56.5 ± 4.0/71.5 ± 4.3 |
| Blank HA-ENVs | 10:0.4:0:0 | 68.8 ± 3.5 | 0.091 | 53 | - |

*HA-ENVs: Detergent free HA coated ENVs; SPC: Soybean phosphatidylcholine; Milt: Miltefosine*
